# Supplementary material for: Body temperature-responsive two-way and moisture-responsive one-way shape memory behaviors of poly(ethylene glycol)-based networks
Source: Royal Society of Chemistry journal article supplement (doi:10.1039/c7py00786h), 2017-01-01
Supplement: c7py00786h1.pdf [file c7py00786h1.pdf]

## Supplementary Information

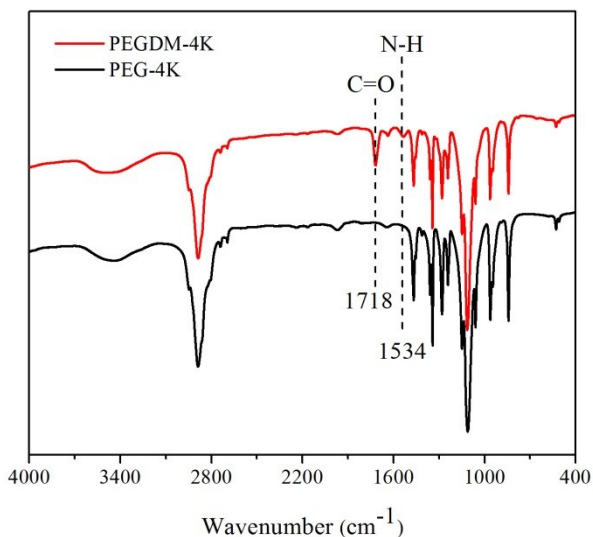

Figure S1. FTIR spectra of PEG-4k and PEGDM-4k.

Table S1. Gel fraction and swelling ratio of single PEG-containing networks.

| Network | Gel fraction (%) | Swelling ratio (%) |
|---------|------------------|--------------------|
| PEG-2k  | 86.7             | 276.6              |
| PEG-4k  | 76.1             | 454.7              |
| PEG-6k  | 69.1             | 512.5              |
| PEG-10k | 46.0             | 724.4              |

Table S2. DSC results of single PEG-containing networks

| Network | Run     | T <sub>onset</sub> (°C) | T <sub>p</sub> (°C) | T <sub>end</sub> (°C) | ΔH (J/g) | X (%) |
|---------|---------|-------------------------|---------------------|-----------------------|----------|-------|
| PEG-2k  | heating | 1.4                     | 22.8                | 31.6                  | 26.2     | 12.8  |
|         | cooling | -12.1                   | -25.6               | -30.2                 |          |       |
| PEG-4k  | heating | 12.9                    | 34.7                | 45.1                  | 51.6     | 25.2  |
|         | cooling | 11.2                    | 2.3                 | -13.6                 |          |       |
| PEG-6k  | heating | 16.4                    | 38.8                | 48.3                  | 56.7     | 27.6  |
|         | cooling | 23                      | 10.9                | -2.5                  |          |       |
| PEG-10k | heating | 25.5                    | 53.1                | 63.8                  | 76.8     | 37.5  |
|         | cooling | 33.5                    | 24.9                | 7.7                   |          |       |
